# Supplementary material
Source: publisher figshare collection journal article supplement (https://sage.figshare.com/ndownloader/files/14189402)

**SUPPLEMENTARY APPENDIX 4: ACR/NPF 2018 Psoriatic Arthritis Guideline Flowchart of the Study Selection Process**

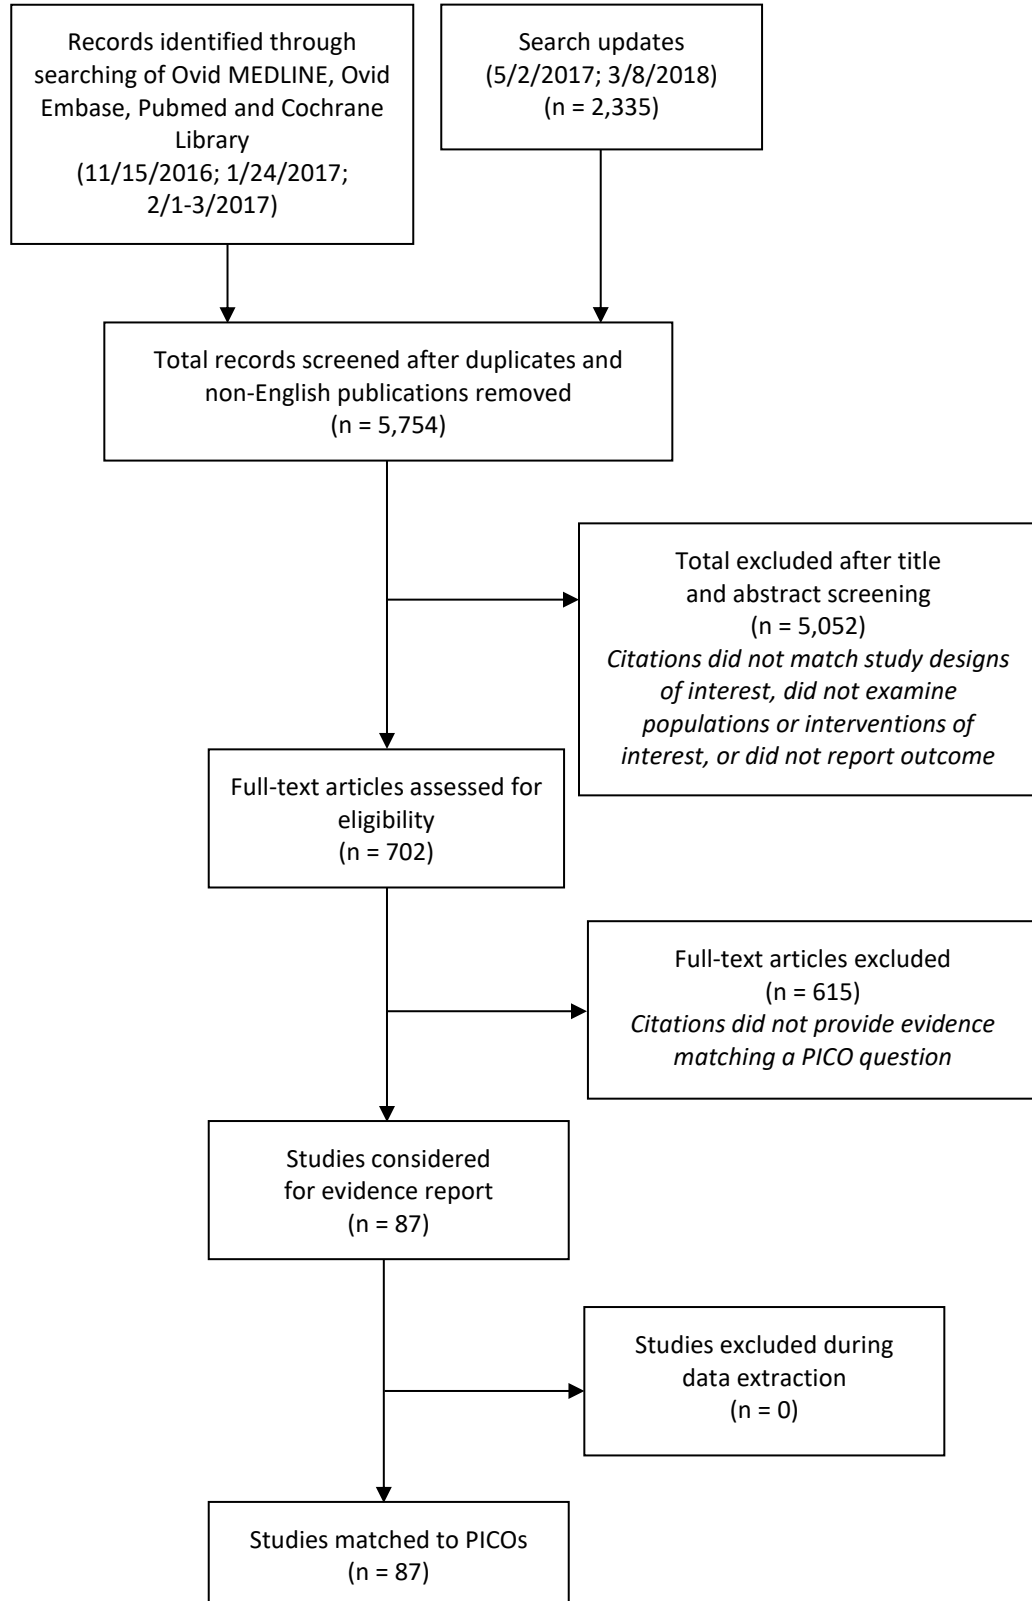

Supplement: Supplementary file 1 [file 14189402]
